# Supplementary material
Source: Springer Nature journal article supplement (https://www.springermedizin.de/resource/supplementary/12984_2008_160_MOESM3_ESM.pdf/9605430)

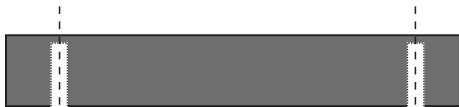

Rim

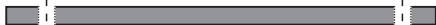

Surface

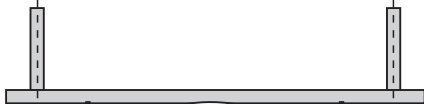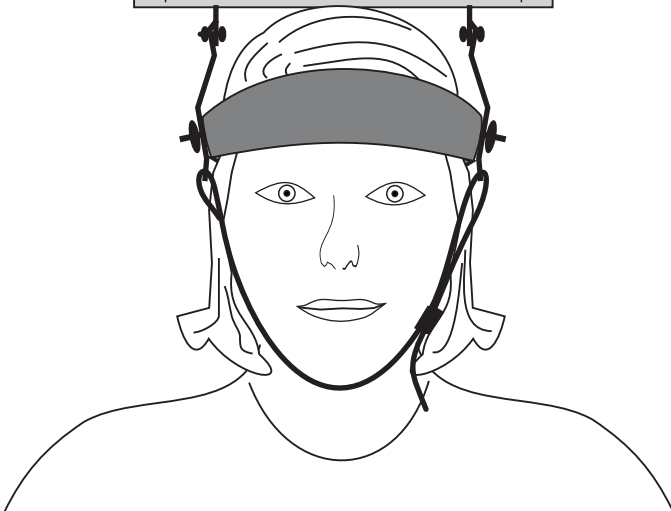

Supplement: MOESM3 [file 9605430]
